## Statistical learning as reinforcement learning phenomena

Orpella J<sup>4</sup>, Mas-Herrero E<sup>1, 2</sup>, Ripollés P<sup>4</sup>, Marco-Pallarés J<sup>1,2,3</sup>, de Diego-Balaguer R<sup>1, 2,</sup>

<sup>3, 5</sup>.

<sup>1</sup>Cognition and Brain Plasticity Unit, IDIBELL, L'Hospitalet de Llobregat, Spain

<sup>2</sup>Dept of Cognition Development and Educational Psychology, University of Barcelona, Barcelona, Spain

<sup>3</sup>Institute of Neuroscience, University of Barcelona, Barcelona, Spain

<sup>4</sup>Dept of Psychology, New York University, New York, USA

<sup>5</sup>ICREA, Barcelona, Spain

**Corresponding author**

**Ruth de Diego-Balaguer**

**Faculty of Psychology**

**Pg. Vall d'Hebron 171**

**08035 Barcelona**

**tel. +34 934 034 768**

**[ruth.dediego@ub.edu](mailto:ruth.dediego@ub.edu)**

1 **Abstract**

2 Statistical learning (SL) is the ability to extract regularities from the environment. In the domain  
3 of language, this ability is fundamental in the learning of words and structural rules. In lack of  
4 reliable online measures, statistical word and rule learning have been primarily investigated  
5 using offline (post-familiarization) tests, which gives limited insights into the dynamics of SL and  
6 its neural basis. Here, we capitalize on a novel task that tracks the *online* statistical learning of  
7 language rules combined with computational modelling to show that online SL responds to  
8 reinforcement learning principles rooted in striatal function. Specifically, we demonstrate - on  
9 two different cohorts - that a Temporal Difference model, which relies on prediction errors,  
10 accounts for participants' online learning behavior. We then show that the trial-by-trial  
11 development of predictions through learning strongly correlates with activity in both ventral and  
12 dorsal striatum. Our results thus provide a detailed mechanistic account of language-related SL  
13 and an explanation for the oft-cited implication of the striatum in SL tasks. This work,  
14 therefore, bridges the longstanding gap between language learning and reinforcement learning  
15 phenomena.

## 16 Introduction

17 Statistical Learning (SL) is the ability to extract regularities from distributional information in  
18 the environment. As a concept, SL was most popularized by the work of Saffran and colleagues,  
19 who first demonstrated infants' use of the transitional probabilities between syllables to learn  
20 both novel words(1) as well as simple grammatical relations(2). The idea of a mechanism for SL  
21 has since raised a considerable amount of interest, and much research has been devoted to  
22 mapping the scope of this cognitive feat. This work has been crucial in *describing* the SL  
23 phenomenon as it occurs across sensory modalities (auditory(3-5), visual(6,7) and haptic(8)),  
24 domains(7) (temporal and spatial), age groups(9,10), and even species (non-human  
25 primates(11), and rats(12)). After all this research, however, little is yet known about the  
26 *mechanisms* by which SL unfolds and their neural substrates.

27 Work on SL has recently moved towards the use of *online* measures of learning, which afford a  
28 more detailed representation of the learning dynamics than typically used post-familiarization  
29 test scores(13,14). Online measures capitalize on the gradual development of participants'  
30 ability to *predict* upcoming sensory information (e.g., an upcoming syllable or word) as the  
31 regularities of the input are learned (e.g., a statistical word-form or a grammatical pattern).  
32 Indeed, prediction is often understood as the primary *consequence* of SL(15,16). Interestingly,  
33 however, the status of prediction as a *mechanism* for SL, rather than the consequence of it, that  
34 is, its causal implication in learning, has not been explicitly investigated.

35 In the current study, we examined the online development of predictions as a fundamental  
36 computation for SL. In particular, we used an amply validated algorithm of reinforcement  
37 learning -Temporal Difference(17,18) (TD)- to model participants' online learning behavior  
38 and investigate its neural correlates. Note that, in adopting a model of reinforcement learning, a  
39 domain where reward generally plays an important role, we are not assuming (nor discarding)  
40 the phenomenological experience of reward (e.g., intrinsic reward(19,20)) during SL. Instead,  
41 we assessed whether particular computational principles reflected in TD learning can account  
42 for participants' SL behavior and their brain activity during learning.

43 TD models are based on the succession of predictions and prediction errors (the difference  
44 between *predicted* and *actual* outcomes) at each time-step, by which predictions are gradually  
45 tuned. In contrast to models typically used to explain SL (e.g., (21,22)), a vast body of research  
46 supports the neurobiological plausibility of TD learning, with findings of neural correlates of  
47 predictions and prediction errors both using cellular-level recordings and functional Magnetic  
48 Resonance Imaging (fMRI). Several brain areas, notably the *striatum*, have been implicated in  
49 the shaping of predictions over time and the selection of corresponding output behavior(23-  
50 28). Interestingly, activity in the striatum has also been documented in SL in relation to  
51 rule(29,30) as well as phonological word-form learning(31), but the precise role of these  
52 subcortical structures in this domain remains unspecified.

53 With the aim of clarifying the mechanisms for SL and their neural underpinnings, we  
54 combined computational (TD) modeling with fMRI of participants' brain activity while  
55 performing a language learning task. In particular, participants completed an incidental non-  
56 adjacent dependency learning paradigm. In natural languages, non-adjacent dependencies are  
57 abundant and reflect important morphological and syntactic probabilistic rules (e.g., the  
58 relationship between *un* and *able* in *unbelievable*). Sensitivity to non-adjacent dependencies is  
59 therefore important for grammar learning as well as for the early stages of word learning (i.e.  
60 speech segmentation), both in prelexical-development(2) and beyond (i.e., second language  
61 acquisition(32)). The main advantage of this particular rule-learning task over similar SL tasks  
62 (e.g., (2,33)) is that it provides a reliable measure of *online* learning(34) that we can then model.  
63 We used a TD algorithm for its greater sensitivity to temporal structure compared to simpler  
64 RL models (e.g. Rescorla-Wagner(35)). Note that this an important prerequisite for non-  
65 adjacent dependency learning specifically, since the to-be-associated elements are separated in  
66 time. Nonetheless, we additionally investigated the adequacy of these simpler algorithms.

67 We expected the interplay of predictions and prediction errors, as modeled by the TD  
68 algorithm, to closely match participants' online rule-learning behavior. In addition, and in line

69 with the aforementioned research on both reinforcement learning and SL, we expected striatal  
70 activity to be associated with the computation of predictions.

## 71 **Results**

72 Two independent cohorts (Behavioral group: N = 19; fMRI group: N = 31) performed the  
73 same incidental non-adjacent dependency learning task (see Methods for details). In brief,  
74 participants were exposed to an artificial language, which, unbeknownst to them, contained  
75 statistical dependencies between the initial (A) and final (C) elements of three-word phrases.  
76 Orthogonal to SL, participants' instructions were to detect the presence or absence of a given  
77 target word, which was always the final C element of one of the two A\_C dependencies  
78 presented. Online SL was measured as participants' decrease in reaction times (RTs) over trials,  
79 which reflects the gradual learning of the predictive value of the initial element A in respect to  
80 the dependent element C of each phrase (i.e., the equivalent of learning that *um* predicts *able* in  
81 *unbelievable*). In line with previous research(34), we expected faster reaction times in a Rule  
82 block with such dependencies compared to a No Rule block with no statistical dependencies  
83 (i.e. equally probable element combinations). This indicates that participants learned the  
84 dependency between A and C elements, and were thus able to use the identity of the initial  
85 word A to predict the presence or absence of their target word C.

86 This behavioral paradigm was initially tested in a group of nineteen volunteers (Behavioral  
87 group: N = 19; 15 women; mean age = 21 years,  $SD = 1.47$ ). After ruling out Order effects  
88 (Rule block first/No Rule block first; main effect of Order and all its interactions with other  
89 factors  $p > 0.4$ ), a repeated-measures ANOVA with Rule (Rule/No Rule) and Target  
90 (Target/No Target) as within-participant factors confirmed that learning of the dependencies  
91 occurred over the Rule block. In particular, responses to phrases in the Rule block were overall  
92 faster compared to the No Rule block ( $F(1,18) = 13.6$ ,  $p < 0.002$ , Partial  $\eta^2 = 0.43$ ; mean  
93 difference = 149.40ms,  $SE = 40.51$ ; Fig. 1A). A significant effect of Target ( $F(1,18) = 24.46$ ,  $p <$   
94  $0.001$ , Partial  $\eta^2 = 0.58$ ) further indicated, as reported previously(34), that responses to target C  
95 elements were faster than to no target C elements (mean difference = 68.66ms,  $SE = 13.88$ ).

96 Importantly, we found no interaction between Rule and Target ( $F(1,18) = 0.53, p > 0.48$ ),  
97 suggesting that both dependencies were learned comparably.

98 **Figure 1. Behavioral group's rule-learning and temporal difference (TD) model results.** (A) Mean reaction times and  
99 error bars in the Rule and No Rule blocks. The graph shows faster reaction times for Rule compared to No Rule  
100 phrases, indicating successful learning,  $** p < 0.01$  (B) Plot of participants' mean reaction times (blue) against the TD  
101 model's estimates of the development of predictions over learning (red; inverted as  $1-P(A)$  before averaging and z-  
102 scoring for display purposes). Vertical bars are the SD. RTs = reaction times. Reaction times were initially normalized  
103 between 0 and 1 (Methods) and are plotted with the model estimates in z-score values.  $P(A)$  = TD model's predictions  
104 from the initial word (A) of the dependencies.

105 We next assessed the extent to which a TD model (see Methods) could predict participants'  
106 rule-learning behavior. If participants' reaction times reflect rule-learning in terms of the ability  
107 to *predict* the last element (C) of a phrase from the identity of the initial (A) element, their  
108 overall development should be mimicked by the model parameter representing the predictive  
109 value of the initial (A) element ( $P(A)$ ; see Methods). That is, with time, the predictive value of  
110 the initial A element according to the TD model should change (*increase*) in a way resembling  
111 participants' reaction times. Note that reaction times can reflect prediction learning as well as  
112 fluctuations due to decision processes, motor response preparation and execution, random  
113 waxing and waning of attention, and system noise, which are not the object of this investigation.  
114 Indeed, we used modelling to strip these off and so derive a purer measure of prediction  
115 learning. Figure 1B shows the development of participants' reaction times over trials plotted  
116 against the development of the predictive value of the initial word A ( $P(A)$ ) as computed by the  
117 TD model (inverted as  $1-P(A)$  and z-scored for display purposes). Model fit was evaluated at  
118 the individual level by the Model Fit Index (see Methods), calculated as 1 minus the Log-  
119 Likelihood Ratio (LLR) between the Log-Likelihood Estimate (LLE) for the TD model and  
120 the LLE for a model predicting at chance. Model Fit Index values of 1 would indicate an exact  
121 model fit. Our results show a group average Model Fit Index of 0.74 ( $std = 0.05$ ), indicating that  
122 the TD model was 3 to 4 times better than the chance model at adjusting to participants'  
123 reaction times. We additionally compared the performance of the TD model against that of a

124 Rescorla-Wagner (RW) model(35) (Supplementary Information, Fig. S1). In contrast to the  
125 TD model, the RW model treats each AX\_ combination as a single event, therefore combining  
126 the predictive values of the two (A plus X) elements (35–37), and so does not take into account  
127 non-adjacent relations (which are captured by the TD model through the devaluation of the  
128 prediction parameter; see Methods). A paired-samples *t*-test indicated that Model Fit Index  
129 values produced by the TD model were significantly better than those produced by the RW  
130 Model (mean difference = 0.098, *SE* = 0.013;  $t(18) = 7.65$ ,  $p < 0.001$ ,  $d = 0.83$ ), which only  
131 achieved an average Model Fit Index of 0.64 (2 to 3 times better than the chance model; *std* =  
132 0.1). The TD model was, therefore, superior to the RW in adjusting to participants' reaction  
133 time data.

134 We then replicated these behavioral results on a new cohort of participants from whom we  
135 additionally acquired fMRI data while performing the incidental non-adjacent dependency  
136 learning task (fMRI group;  $N = 31$ ; 20 women; mean age = 23 years,  $SD = 3.62$ ). We used the  
137 same analytical procedure to evaluate rule learning at the behavioral level and model adequacy  
138 thereafter. Having discarded block order effects (main effect of Order and all interactions:  $p >$   
139 0.1), a repeated-measures ANOVA with factors Rule (Rule/No Rule) and Target (Target/No  
140 Target) indicated that rule-learning occurred in the Rule block ( $F(1,30) = 4.96$ ,  $p < 0.034$ ,  
141 Partial  $\eta^2 = 0.14$ ), again with faster mean reaction times to rule compared to no rule phrases  
142 (mean difference = 42.67ms, *SE* = 19.16; Fig. 2A). As expected, reaction times to target C  
143 elements were faster than to no target C elements (mean difference = 57.2ms, *SE* = 43.28;  
144  $F(1,30) = 54.15$ ,  $p < 0.001$ , Partial  $\eta^2 = 0.64$ ). As with the behavioral group's data, the null  
145 interaction between the factors Rule and Target ( $F(1,30) = 0.168$ ,  $p > 0.68$ ) indicated that both  
146 target and no target dependencies were similarly learned.

147 **Figure 2. fMRI group's rule-learning and TD model results. (A)** Mean reaction times and error bars in the Rule and  
148 No Rule blocks. Faster reaction times for Rule compared to No Rule phrases indicate successful learning. \*  $p < 0.05$   
149 **(B)** Plot of participants' mean reaction times (blue) against the TD model's estimates of the development of predictions  
150 over learning (red; inverted as  $1-P(A)$  before averaging and z-scoring for display purposes). Vertical bars are the SD.

151 RTs = reaction times. Reaction times were initially normalized between 0 and 1 (Methods) and are plotted with the  
152 model estimates in z-score values.  $P(A)$  = TD model's predictions from the initial word (A) of the dependencies.

153 We next fitted the TD model to the fMRI group behavioral dataset. The development of  
154 participants' reaction times is plotted in Figure 2B with the development of the predictive value  
155 of the initial element (A) according to the TD model. At a group level, the mean Model Fit  
156 Index was 0.71 ( $std = 0.04$ ), again indicating a fit between 3 and 4 times better than that of a  
157 model predicting at chance. This was also significantly better than the average Model Fit Index  
158 produced by the RW Model (mean difference = 0.11,  $SE = 0.01$ ;  $t(30) = 12.20$ ,  $p < 0.001$ ,  $d =$   
159 1.26), which only reached a benchmark of 0.6 (again, 2 to 3 times better than the chance  
160 model;  $std = 0.08$ ; Fig. S1).

161 These results, therefore, represent a replication of our previous findings from the Behavioral  
162 group, both in terms of the participants' overall statistical learning behavior and the adequacy of  
163 the TD model in providing a mechanistic account of its dynamics.

164 To investigate the brain areas or networks sensitive to the trial-wise computations related to  
165 statistical rule-learning from speech, we used a measure of the trial-by-trial development of  
166 predictions from the initial word A of rule phrases ( $P(A)$ ; see Methods) as estimated by the TD  
167 model for each participant. Specifically, we correlated this proxy for prediction learning with  
168 participants' trial-wise BOLD signal measures for the Rule block, time-locked to the onset of  
169 the A element of each phrase. The contrast between  $P(A)$ -modulated Rule block activity against  
170 an implicit baseline (Methods) yielded a large cluster covering most of the striatum (i.e.,  
171 bilateral caudate nuclei, putamen, and ventral striatum; Fig. 3 and Table S1). Also, noteworthy,  
172 there were two additional clusters, one in the left superior posterior temporal gyrus extending  
173 medially to Rolandic opercular regions and another including right inferior and middle occipital  
174 areas. While formalized as prediction learning, we note that activity in these regions could also  
175 reflect the gradual increase in prediction error on the initial element A of each phrase. This is  
176 because predictions and prediction errors on the A element should be commensurate with  
177 each other, since it can never be anticipated (see Methods). An investigation of prediction error



178 responses on the C (target/non-target) elements was not possible due to the presence of button  
179 presses on these elements as required by the task.

180 **Figure 3. Brain regions related to prediction learning (Rule  $P(A)$  - Baseline).** Activity in the Basal Ganglia (bilateral  
181 caudate nuclei, putamen, and ventral striatum) and in the left posterior superior temporal gyrus (STG) was modulated  
182 the trial-by-trial development of predictions ( $P(A)$ ) as estimated by the TD model (contrast: Rule  $P(A)$  - Baseline).  
183 Results are reported for clusters FWE-corrected at  $p < 0.001$  at the cluster level (minimum cluster size = 20), with an  
184 additional  $p < 0.001$  uncorrected threshold at the voxel level. Neurological convention is used with MNI coordinates  
185 shown at the bottom right of each slice.

186 In order to further support the specificity of these results, we completed a series of control  
187 analyses. First, while, by definition, no rule can be derived from the No Rule block, this does  
188 not preclude the engagement of particular brain regions in the attempt to capture the  
189 relationship between specific phrase elements. In other words, we cannot ascertain that similar  
190 type-computations are not taking place in the No Rule block, even when these will accrue no  
191 substantial knowledge. Therefore, to assess the specificity of the reported clusters in prediction  
192 *learning*, we next contrasted  $P(A)$ -modulated activity for Rule and No Rule blocks directly (see  
193 Methods). That is, we compared the brain activity related to the trial-by-trial predictive value of  
194 stimuli A during the Rule block to its counterpart during the No Rule block. Significant  
195 differences centered on the same two relatively large clusters (Figure S2) observed in the main  
196 analysis, namely bilateral caudate, putamen and ventral striatum and right middle occipital  
197 cortex (not shown in the figure), with previous left temporal areas not reaching significance by  
198 our selected threshold (Table S2). The converse contrast ( $P(A)$ -modulated No Rule vs  $P(A)$ -  
199 modulated Rule) did not produce any significant results.

200 It is generally understood that the final goal of (TD) learning is to inform behavior(37). Even if  
201 we consider predictions themselves as some form of *covert* behavior(38) used to optimize  
202 online learning and processing, our paradigm also required participants to make an *overt*  
203 response (a button press) to the presence of their target word. Reaction times are often used as  
204 modulators of a condition's related BOLD signal to extract the variability pertaining to such  
205 motor responses. However, as previously illustrated (Fig. 1 and Fig. 2), reaction times in the

206 Rule block will tend to show a close relationship to online learning. Hence, a more suitable  
207 baseline to remove response related brain activity is the reaction times to the No Rule block,  
208 that is, where no specific rule-learning can occur. We therefore contrasted  $P(A)$ -modulated  
209 Rule block activity with the reaction time (RT)-modulated No Rule block activity (activity  
210 estimates for the contrast between  $P(A)$ -modulated Rule and RT-modulated Rule activity are  
211 also reported in Fig. S4 and Table S4). Significant prediction-related Rule activity remained in  
212 the dorsal striatum, particularly in bilateral caudate nuclei and right putamen (Figure S3 and  
213 Table S3). Altogether, therefore, our analyses (main and control) demonstrate that activity  
214 within the striatum was related to the computations that facilitate statistical rule-learning from  
215 speech as predicted by the TD model.

## 216 Discussion

217 In this study, we provide evidence for the SL of non-adjacent dependencies as an instance of  
218 reinforcement learning. A TD model of reinforcement learning, which capitalizes on the  
219 iteration of predictions and prediction errors, was able to mimic participants' reaction time data  
220 reflecting gradual SL over trials. This was replicated on two independent cohorts, producing  
221 similar model fits that were also clearly superior to those of simpler learning models. Functional  
222 neuroimaging data of participants' online learning behavior also allowed us to examine the  
223 neural correlates of prediction-based SL. In line with neuro-computational models of TD  
224 learning, the trial-by-trial development of predictions from the initial word of the dependencies  
225 was strongly related to activity in bilateral striatum. Importantly, striatal activity was unrelated to  
226 the overt motor responses required by the task (i.e., button presses) or more general  
227 computations, supporting the implication of the striatum *specifically* in prediction-based SL.  
228 Evidence for the adequacy of a TD algorithm in capturing participants' online learning behavior  
229 offers novel insights into the mechanisms for SL. In particular, our results underscore the  
230 causal role of predictions for learning, compelling us to reassess the commonly assumed  
231 relationship between SL and predictive processing. Indeed, SL not only enables predictions  
232 (predictions as a *consequence* of SL), as generally understood (see p.e.(13)), but also capitalizes

233 on predictions (predictions as *a cause* of SL). This new understanding of SL can thus offer  
234 interesting reinterpretations of previously reported correlations between SL abilities and  
235 predictive processing(15), raising questions about the direction of causality.

236 Moreover, our results make an important contribution to the understanding of the neuro-  
237 biological basis of SL. While previous research(13,39) has shown a similar behavioral  
238 development of online SL (cf. Fig. 1), brain imaging data and its link to a mechanistic  
239 explanation of learning were lacking. Here we used a measure of online SL behavior in  
240 combination with computational modeling and fMRI data to unveil the basic mechanism  
241 underlying learning and its brain correlates. A complementary approach to describing online  
242 SL, which involves the frequency-tagging of participants' neurophysiological responses over  
243 learning(40-42), has recently been used to track the emergence of new representations (in time  
244 and neuro-anatomical space) as participants learn. We add to these findings by providing a  
245 mechanistic account for *how* these representations (i.e., learning) come to be and a plausible  
246 neuro-anatomical substrate for its key computations. In particular, we show that the gradual  
247 development of predictions for SL is related to robust and widespread activity in bilateral  
248 striatum. This finding adds a valuable degree of specificity to the oft-reported implication of  
249 these subcortical structures in artificial grammar learning and SL more generally(29-31).

250 Furthermore, both the adequacy of a TD model and the involvement of the striatum in  
251 prediction-based SL place this cognitive ability squarely in the terrain of reinforcement learning.  
252 Indeed, the link between prediction learning and activity in the striatum is one of the most  
253 robust findings in the reinforcement learning literature, from intracranial recordings to fMRI  
254 studies(24-28,37,43-45). Activity in the ventral striatum, in particular, has been associated with  
255 the delivery and anticipation of rewarding stimuli of different types (i.e. from primary to higher-  
256 order rewards)(46). More specifically, the ventral striatum interacts in complex ways with the  
257 dopaminergic system (mainly Ventral Tegmental area/Substantial Nigra pars compacta;  
258 VTA/SNc) with responses consistent with the computation of reward P.E.(23,47-49). Under  
259 this light, our reported pattern of activity in the ventral striatum is consistent with the gradual

260 transfer over learning of prediction error related dopaminergic responses from rewarding to  
261 predictive stimuli as found in classic conditioning paradigms(50,51). That is, a gradual increase  
262 in response on A elements may be expected as their predictive value is learned, since these  
263 elements can never be anticipated. Alternatively, activity in the ventral striatum could reflect  
264 inhibitory signals aimed to attenuate dopaminergic inputs from the VTA/SNc(52) in response  
265 to C elements as these become more predictable.

266 From a theoretical standpoint, it may be necessary to distinguish between the response of the  
267 reward system for learning and the phenomenological experience of reward(20,53). Recent  
268 evidence(54-56), nonetheless, supports the notion of language learning as *intrinsically*  
269 rewarding(19), and suggests quantitative over qualitative differences between endogenous and  
270 exogenous sources of reward(20). So far, the adequacy of reinforcement learning algorithms for  
271 the learning of intrinsically rewarding tasks has mainly remained theoretical(20,57). Our results  
272 now contribute to this literature by showing their suitability in specific instances of SL.

273 Still within the computations of the TD model, activity in the caudate nuclei of the dorsal  
274 striatum could respond to the updates at each timestep of the outcome value representations  
275 associated with each stimulus in ventromedial and orbitofrontal areas(58). Caudate activity  
276 could also promote the (attentional) selection of behaviorally relevant elements in the phrase in  
277 frontal cortical areas(59-61). While this attentional selection should initially pertain to C  
278 elements (the target of the monitoring task), a shift towards A elements may be expected as  
279 their predictive value increases. This interpretation is consistent with the finding of a gradual  
280 increase in the P2 ERP component (related to attentional deployment) over the exposure to (A  
281 elements of) non-adjacent dependencies but not to similar but unstructured material(62,63).

282 Finally, activity in bilateral putamen could relate to the selection of the specific motor actions in  
283 pre/motor regions(64). The fact that the response of this area is reduced but not eliminated  
284 when regressing out overt motor responses (button presses; Fig. S3; cf. Fig. 3) raises the  
285 possibility that putaminal activity additionally reflects the selection of *covert* motor responses,  
286 namely, of (speech) motor programs corresponding to the predicted (C) elements. The

287 selection of these motor-articulatory plans may be used to generate sensory-level  
288 predictions(38) ultimately translating into increasingly faster RTs for predicted C elements. In  
289 this view, activity in the pSTG (see Fig. 3) would reflect the downstream (i.e. sensory)  
290 consequences of this selection(38). We conjecture that prediction-based SL is fundamentally  
291 linked to such motor engagement as part of the learning mechanism orchestrated by the  
292 striatum. This is consistent with the observation that participants more adept to predicting  
293 speech inputs embedded in noise, known to involve the speech motor system(65), are also  
294 better statistical learners(15), and agrees with the well-accepted role for these structures in  
295 procedural learning(66,67) and the managing of motor routines(49,64,68). Note that this speech  
296 motor engagement for learning should become of critical importance when putative alternative  
297 learning mechanisms (e.g., purely sensory based) are weakest, for example, when a temporal  
298 separation is imposed between the elements to be associated, as in our non-adjacent  
299 dependency learning task.

300 In contrast to previous research on grammar learning(31,69,70), the trial-wise development of  
301 predictions did not reveal significant activity in the left inferior frontal gyrus (though see Fig.  
302 S5). As noted by Karuza and colleagues(14), a possible explanation for this concerns the  
303 emphasis that particular models of learning place on specific computations, with TD models  
304 being most sensitive to subcortical (rather than neo-cortical) activity(14). Future research should  
305 investigate alternative models of learning as a means to relate other neural correlates of SL,  
306 such as the left inferior frontal gyrus, to other subroutines of the learning process.

307 In sum, by the combination of an online measure of SL, computational modeling, and  
308 functional neuroimaging, we provide evidence for SL as a process of gradual prediction learning  
309 strongly related to striatal function. This work, therefore, makes a valuable contribution to our  
310 understanding of the mechanisms and neurobiology of this cognitive phenomenon, and  
311 introduces the provoking possibility of language-related SL as an instance of reinforcement  
312 learning orchestrated by the striatum.

313 **Materials and Methods**

## 314 **Participants**

315 Two independent cohorts participated in the study. We first collected data from twenty  
316 volunteers from the Facultat de Psicologia of the Universitat de Barcelona as the behavioral  
317 group. Data from one participant was not correctly recorded, so the final cohort comprised  
318 nineteen participants (15 women, mean age = 21 years,  $sd = 1.47$ ). We used the partial  $\eta^2$   
319 obtained for the main effect of Rule in the behavioral group to compute a sample size analysis  
320 for the fMRI group. To ensure 90% of power to detect a significant effect in a 2 x 2 repeated  
321 measures ANOVA at the 5% significance level based on this measure of effect size,  
322 MorePower(71) estimated that we would need a sample size of at least 16 participants.  
323 However, considering i) that we expected participants to perform worse inside of the fMRI  
324 scanner, and ii) the recommendation that at least 30 participants should be included in an  
325 experiment in which the expected effect size is medium to large(72), we finally decided to  
326 double the recommended sample size for the fMRI experiment. The fMRI group thus  
327 consisted of 31 participants (20 women, mean age = 23 years,  $sd = 3.62$ ) recruited at the  
328 Universidad de Granada. All participants were right-handed native Spanish speakers and self-  
329 reported no history of neurological or auditory problems. Participants in the fMRI group were  
330 cleared for MRI compatibility. The study was approved by the ethics committee of the  
331 Universitat de Barcelona and the ERC ethics scientific office and was conducted in accordance  
332 with the Declaration of Helsinki. Participation was remunerated and proceeded with the written  
333 informed consent of all participants.

## 334 **Rule Learning Paradigm**

335 Two different artificial languages were used in the rule-learning task. Each language comprised  
336 twenty-eight bi-syllabic (consonant-vowel-consonant-vowel) pseudo-words (henceforth, words).  
337 Words were created using Mbrola speech synthesizer v3.02b (Dutoit et al. 1996) through  
338 concatenating diphones from the Spanish male database ‘es1’ (<http://tcts.fpms.ac.be/synthesis/>)  
339 at a voice frequency of 16 KHz. The duration of each word was 385ms. Words were combined  
340 to form three-word phrases with 100ms of silence inserted between words. Phrase stimuli were

341 presented using the software Presentation® (Neurobehavioral Systems) via Sennheiser® over-  
342 ear headphones (pilot group) and MRI-compatible earphones (Sensimetrics™, Malden, MA,  
343 USA; fMRI group).

344 The learning phase consisted of a Rule block and a No Rule block, each employing a different  
345 language. The order of blocks was counterbalanced between participants. We also  
346 counterbalanced the languages assigned to Rule and No Rule blocks. The Rule block consisted  
347 of 72 rule phrases (phrases with dependencies) whereby the initial word (A) was 100%  
348 predictive of the last word (C) of the phrase. We used two different dependencies (A1\_C1 and  
349 A2\_C2) presented over 18 different intervening (X) elements to form AXC-type phrases.  
350 Twelve of the 18 X elements were common to both dependencies, while the remaining 6 were  
351 unique to each dependency. These 36 rule phrases were presented twice over the Rule block,  
352 making a total of 72 AXC-type rule phrases issued in pseudo-random order. The probability of  
353 transitioning from a given A element to a particular X was therefore 0.056. Phrases in the No  
354 Rule block were made out of the combination two X elements and a final C element (either C1  
355 or C2, occurring with equal probability). Note that, while C elements could be predicted with  
356 100% certainty in the Rule block, these could not be predicted from the previous X elements in  
357 the No Rule block. X elements were combined so that each X word had an equal probability to  
358 appear in first and second position but never twice within the same phrase. Forty-eight no rule  
359 phrases were presented twice over the No Rule block, making a total of 96 pseudo-randomized  
360 XXC-type no rule phrases. Each three-word phrase, in both Rule and No Rule blocks, was  
361 considered a trial. A recognition test was issued at the end of each block to assess offline  
362 learning (see Supplementary Information for further details).

363 To obtain an online measure of incidental learning, participants were instructed to detect, as  
364 fast as possible via a button press, the presence or absence of a given target word. The target  
365 word for each participant remained constant throughout the block and was no other than one  
366 of the two C elements of the language (C1 or C2, counterbalanced). A written version of the  
367 participant's target word was displayed in the middle of the screen for reference throughout the

368 entire learning phase. Importantly, participants were not informed about the presence of rules,  
369 so this word-monitoring task was in essence orthogonal to rule-learning. Yet, if incidental  
370 learning of the dependencies occurred over trials in the Rule block, faster mean reaction times  
371 should be observed for this block compared to the No Rule block where the appearance or  
372 non-appearance of the target word could not be anticipated from any of the preceding  
373 elements.

374 Participants in the behavioral group indicated the detection or non-detection of the target word  
375 by pressing the left and right arrow keys of the computer keyboard, respectively. They were  
376 required to use their left index finger to press the left arrow key, and the right index finger to  
377 press the right arrow key. Participants in the fMRI group responded using the buttons  
378 corresponding to thumb and index fingers in an MRI compatible device held in their right  
379 hand. Response buttons were not counterbalanced for either group. Inter-trial interval was fixed  
380 at 1000ms in the pilot study and jittered (with pseudo-random values between 1000 and  
381 3000ms) for testing during fMRI acquisition. At the end of a given phrase, a maximum of  
382 1000ms was allowed for participants to respond. Reaction times were calculated from onset of  
383 the last word in the phrase until button press. Only trials with correct responses were entered  
384 into subsequent analyses. Participants' Rule Effects were calculated as the mean reaction time  
385 difference between no rule and rule trials. A repeated-measures ANOVA on participants'  
386 reaction time data with within-subjects factors Rule (Rule/No Rule) and Target (Target/No  
387 Target) and Order as a between-subjects factor was initially performed to discard block order  
388 effects. A repeated-measures ANOVA with factors Rule (Rule/No Rule) and Target (Target/No  
389 Target) was subsequently performed to assess the statistical significance of rule learning.

### 390 **Temporal Difference model**

391 We modelled subjects' learning of the dependencies using a Temporal Difference (TD)  
392 model(17,18). Drawing from earlier models of associative learning, such as the Rescorla-  
393 Wagner (RW) model(35), the main assumption of TD models is that learning is driven by a



394 measure of the mismatch between predicted and actual outcome(17,18,37,73) (i.e., prediction  
395 error (P.E.). This scalar quantity is computed as:

$$396 \quad \partial(t) = o(t) - p(t-1) \quad (\text{equation 1})$$

397 where  $\partial(t)$  is the P.E. term at a given time-point  $t$  within a trial, which amounts to the  
398 discrepancy between the outcome  $o$  at that time-point, and the prediction  $p$  at the previous  
399 time-point ( $t-1$ ).

400 Computationally, learning through TD is therefore conceptualized (and modelled) as  
401 *prediction* learning(37), where predictions  $p$  at each time-step are updated according to:

$$402 \quad p(t) = p(t-1) + \alpha \cdot \partial \quad (\text{equation 2})$$

403 where  $\alpha$  is a free parameter that represents the *learning rate* of the participant and determines  
404 the weight attributed to new events and the P.E. they generate(17).

405 One of the advantages of TD models over simpler models of learning, such as the RW, is that  
406 they account for the *sequence* of events leading to an outcome, rather than treating each trial as  
407 a discrete temporal event. That is, although each trial for the participant (i.e., each three-word  
408 phrase) was equivalently treated as a trial for the TD model, model updates occurred at the  
409 presentation of each individual element (see below). TD models are thus sensitive to the  
410 precise temporal relationship between the succession of predictions and outcomes that take  
411 place in a learning trial(17). Note that this is particularly valuable in trying to account for the  
412 learning of non-adjacent dependencies as distinct from adjacent ones, making a TD model  
413 preferable in such cases. This feature is implemented as a temporal discounting factor, this is an  
414 additional free parameter  $\gamma$  that represents the devaluation of predictions that are more distant  
415 from the outcome(44,74). Thus, upon ‘hearing’ the final element of a rule (AXC) phrase, the  
416 prediction from the initial element A was updated according to:

$$417 \quad p(A,t) = p(A,t-1) + \alpha \cdot \partial \cdot \gamma \quad (\text{equation 3})$$

418 To obtain the free parameters  $\alpha$  and  $\gamma$  for each participant, their reaction times were  
419 normalized between 0 and 1 by the function  $1 ./ (1 + \exp(zRTs))$ . We then selected the  $\alpha$  and  $\gamma$   
420 values that produced the minimum Log-Likelihood Estimate (LLE), indicating the best possible  
421 fit between the model predictions and the participant's transformed RTs. For this, we used  
422 Matlab®'s (Matlab® R2017 by Mathworks®) *fmincon* function, which implements a Nelder-  
423 Mead simplex method(75). The model was then run for each block (Rule and No Rule)  
424 separately, from which trial-wise prediction ( $p(A,t)$  and  $p(X,t)$ ) values for the different phrase  
425 elements A and X (resulting in matrices  $P(A)$  and  $P(X)$ , respectively) were computed. We  
426 assigned  $\sigma$  a value of 1 for target outcomes at the end of a trial, and a value of -1 for no target  
427 outcomes. Note that the sign choice represents a convenient yet arbitrary means to distinguish  
428 target and no target outcomes within the same model. This could have been inverted ( $\sigma$  (target)  
429 = - 1,  $\sigma$  (no target) = 1) with no difference in the model's results. Following convention(37), the  
430 P.E. at the presentation of the second element of a phrase (X) was always computed as the  
431 difference between the values of  $P(X,t)$  and  $P(A,t)$ . Finally, it is important to note that, at the  
432 time element A is presented, it is not possible to differentiate the prediction's value from the  
433 P.E. the same element A elicits. The reason is that, according to TD models, *all* events in a trial  
434 will elicit a P.E.. Thus, the P.E. for the initial (unpredicted) element (A) will be  $\partial(A) = p(A) -$   
435  $p(\text{baseline})$  which, given that  $p(\text{baseline}) = 0$ , renders  $\partial(A) = p(A)$ (37). This is therefore  
436 crucial in the interpretation of the reported brain activity related to this parameter (see main  
437 text).

438 To illustrate the consistency between participants' reaction times and model predictions, both  
439 which we assume to be proxies for statistical rule-learning, we plotted the development of  $P(A)$   
440 computed by the model (inverted as  $1-P(A)$ ) averaged across participants against the mean  
441 reaction times of the participants over trials in the Rule block (both z-scored; main text Fig. 1  
442 and Fig. 2).

443 To assess the fit of the TD model, we computed for each participant the Log-Likelihood Ratio  
444 (LLR) between the TD model's LLE and the LLE produced by a model predicting at chance.

445 To make fit assessment more intuitive, a Model Fit Index was then calculated as  $1 - \text{LLR}$ ,  
446 where higher Model Fit Index values equate to a better fit. The overall fit of the TD model was  
447 assessed at the group level by averaging across participants Model Fit Index.

#### 448 **fMRI acquisition and apparatus**

449 The rule-learning task comprised a single run with 830 volumes. Functional T2\*-weighted  
450 images were acquired using a Siemens Magnetom TrioTim syngo MR B17 3T scanner and a  
451 gradient echo-planar imaging sequence to measure blood oxygenation level dependent (BOLD)  
452 contrast over the whole brain [repetition time (TR) 2000ms, echo time (TE) 25ms; 35 slices  
453 acquired in descending order; slice-thickness: 3.5 mm,  $68 \times 68$  matrix in plane resolution =  $3.5$   
454  $\times 3.5$  mm; flip angle =  $180^\circ$ ]. We also acquired a high-resolution 3D T1 structural volume  
455 using a magnetization-prepared rapid-acquisition gradient echo (MPRAGE) sequence [TR =  
456 2500ms, TE = 3.69ms, inversion time (TI) = 1100ms, flip angle =  $90^\circ$ , FOV = 256 mm, spatial  
457 resolution =  $1 \text{ mm}^3/\text{voxel}$ ].

#### 458 **fMRI preprocessing and analysis**

459 Data were preprocessed using Statistical Parameter Mapping software (SPM12, Wellcome Trust  
460 Centre for Neuroimaging, University College, London, UK, [www.fil.ion.ucl.ac.uk/spm/](http://www.fil.ion.ucl.ac.uk/spm/)).

461 Functional images were realigned, and the mean of the images was co-registered to the T1. The  
462 T1 was then segmented into grey and white matter using the Unified Segmentation  
463 algorithm(76) and the resulting forward transformation matrix was used to normalize the  
464 functional images to standard Montreal Neurological Institute (MNI) space. Functional  
465 volumes were re-sampled to  $2 \text{ mm}^3$  voxels and spatially smoothed using an 8 mm FWHM  
466 kernel.

467 Several event-related design matrices were specified for convolutions with the canonical  
468 hemodynamic response function. Trial onsets were always defined as the onset of the first word  
469 of the phrase. To identify brain regions related to the trial-by-trial development of subjects'  
470 predictions/prediction errors, a model with the conditions Rule Target, Rule No Target, No

471 Rule Target and No Rule No Target, and all offline test conditions was specified at the first  
472 level, including a parametric modulator (a vector) corresponding to the trial-wise  
473 prediction/prediction error ( $p(A)$ ) for each of the conditions of interest (Rule Target, Rule No  
474 Target, No Rule Target and No Rule No Target). For each participant, the contrasts Rule  $P(A)$   
475 vs implicit and Rule  $P(A)$  vs. No Rule  $P(A)$  were calculated and entered into corresponding  
476 one-sample  $t$ -tests. An additional model was specified with the aim of removing response  
477 related activity from the  $P(A)$ -modulated regressor. This included the inverted reaction time per  
478 trial as the first parametric modulator for each condition and the  $p(A)$  as its second parametric  
479 modulator. Note that the reaction times for the Rule block will relate to rule learning as well as  
480 motor activity, while the reaction times corresponding to the No Rule block will predominantly  
481 relate to motor responses. For this reason, to identify brain regions modulated by the  $P(A)$  in  
482 the Rule block while extracting response-related motor activity, for each participant we  
483 calculated the contrast Rule  $P(A)$  vs No Rule RTs in addition to the more conventional contrast  
484 Rule  $P(A)$  vs Rule RTs, entering these into one-sample  $t$ -tests at the second level.

485 In all cases, data were high-pass filtered (to a max. of 1/90 Hz). Serial autocorrelations were also  
486 estimated using an autoregressive (AR(1)) model. We additionally included, in all the models  
487 described above, the movement parameter estimates for each subject computed during  
488 preprocessing to minimize the impact of head movement on the data. We used the Automated  
489 Anatomical Labelling Atlas(77) included in the xjView toolbox  
490 (<http://www.alivelearn.net/xjview8/>) to identify anatomical and cytoarchitectonic brain areas.  
491 Group results are reported for clusters at a  $p < 0.001$  FWE-corrected threshold at the cluster  
492 level with a minimum cluster extent of 20 voxels and an additional  $p < 0.001$  uncorrected  
493 threshold at the voxel level.

#### 494 **Acknowledgements**

495 This work was supported by the European Research Council grant ERC-StG-313841 and the  
496 BFU2017-87109-P grant from the Spanish Ministerio de Ciencia e Innovación.

#### 497 **Author Contributions**

498 R.d.D.-B., J.O. and J.M.-P. designed the research. J.O. collected the data. J.O., E.M.-H. and  
499 P.R. analyzed the data. J.O., P.R., E.M.-H., J.M.-P. and R. d. D.-B. wrote the manuscript.

## 500 Competing interests

501 The authors declare no competing interests.

## 502 Supplementary Information Captions

503 **Figure S1.** Plot of **(A)** Behavioral group and **(B)** fMRI group participants' mean reaction times (blue) against the  
504 Rescorla-Wagner model's estimates of the development of predictions over learning (red; inverted as  $1-P(A)$  before  
505 averaging and z-scoring for display purposes). Vertical bars are the SD. RTs = reaction times. Reaction times were  
506 initially normalized between 0 and 1 (Methods) and are plotted with the model prediction estimates in z-score values.  
507  $P(A)$  = Rescorla-Wagner model's predictions from the initial word (A) of the dependencies.

508 **Figure S2. Brain regions related to prediction learning (Rule P(A) - No Rule P(A)).** Activity in the Basal Ganglia  
509 (bilateral caudate nuclei, putamen, and ventral striatum; see Table S2) was modulated the trial-by-trial development of  
510 predictions ( $P(A)$ ) as estimated by the TD model (contrast: Rule - No Rule). Results are reported for clusters FWE-  
511 corrected at  $p < 0.001$  at the cluster level (minimum cluster size = 20), with an additional  $p < 0.001$  uncorrected  
512 threshold at the voxel level. Neurological convention is used with MNI coordinates shown at the bottom right of each  
513 slice.

514 **Figure S3. Brain regions related to prediction learning (Rule P(A) - No Rule RTs).** Subtracting the activity for the No  
515 Rule block modulated by participants' reaction times from the  $P(A)$ -modulated Rule block activity had virtually no  
516 effect on Basal Ganglia activity estimates (see Table S3). Significant centered on the caudate nuclei and the right  
517 putamen. Results are reported at a  $p < 0.001$  FWE-corrected threshold at the cluster level with 20 voxels of minimum  
518 cluster extent, with an additional uncorrected  $p < 0.001$  threshold at the voxel level. Neurological convention is used  
519 with MNI coordinates shown at the bottom right of each slice.

520 **Figure S4. Brain regions related to prediction learning (Rule P(A) - Rule RTs).** Significant activations by the contrast  
521 between  $P(A)$ -modulated Rule and RT-modulated Rule activity (see also Table S4) were found in a widespread left-  
522 lateralized network of areas, including a large portion of the inferior frontal gyrus, parts of the pre- and post-central  
523 gyri, and of the superior temporal gyrus in and around the left auditory cortex. Interestingly, bilateral caudate nuclei  
524 were also statistically significant along with a small portion of the thalamus. Results are reported for clusters FWE-  
525 corrected at  $p < 0.001$  at the cluster level (minimum cluster size = 20), with an additional  $p < 0.001$  uncorrected  
526 threshold at the voxel level. Neurological convention is used with MNI coordinates shown at the bottom right of each  
527 slice.

528 **Table S1. Whole brain fMRI Rule P(A)-modulated activity vs. implicit baseline.** Group-level fMRI local maxima for  
529 the P(A)-modulated Rule against implicit baseline contrast (see also red-yellow regions in **Fig. 3**, main text). Results are  
530 reported for clusters FWE-corrected at  $p < 0.001$  at the cluster level (minimum cluster size = 20), with an additional  $p$   
531  $< 0.001$  uncorrected threshold at the voxel level. MNI coordinates were used. BA, Brodmann Area.

532 **Table S2. Whole brain fMRI P(A)-modulated activity for Rule vs. No Rule.** Group-level fMRI local maxima for the  
533 P(A)-modulated Rule minus P(A)-modulated No Rule contrast (see also red-yellow regions in **Fig. S2**). Results are  
534 reported for clusters FWE-corrected at  $p < 0.001$  at the cluster level (minimum cluster size = 20), with an additional  $p$   
535  $< 0.001$  uncorrected threshold at the voxel level. MNI coordinates were used. BA, Brodmann Area.

536 **Table S3. Whole brain fMRI activity for the P(A)-modulated Rule vs. RT-modulated No Rule contrast.** Group-level  
537 fMRI local maxima for the P(A)-modulated Rule minus RT-modulated No Rule contrast (see also red-yellow regions  
538 in **Fig. S3**). Results are reported at a  $p < 0.001$  FWE-corrected threshold at the cluster level with 20 voxels of minimum  
539 cluster extent, with an additional uncorrected  $p < 0.001$  threshold at the voxel level. MNI coordinates were used. BA,  
540 Brodmann Area.

541 **Table S4. Whole brain fMRI Rule P(A)-modulated activity vs. Rule RT-modulated activity.** Group-level fMRI local  
542 maxima for the P(A)-modulated Rule minus RT -modulated Rule contrast (see also red-yellow regions in **Fig. S4**).  
543 Results are reported for clusters FWE-corrected at  $p < 0.001$  at the cluster level (minimum cluster size = 20), with an  
544 additional  $p < 0.001$  uncorrected threshold at the voxel level. MNI coordinates were used. BA, Brodmann Area.

545 **Text S1. Offline Recognition Test.** Following each block, participants' knowledge of the rules was assessed via a  
546 recognition test. Participants were presented with correct sentences (phrases that conformed the rules) and incorrect  
547 sentences (phrases that violated the rules). In half the trials, incorrect sentences consisted of violations of the A\_C  
548 dependencies where A and C elements maintained their correct order within the phrase but belonged to different rule  
549 structures (i.e., A1xC2, A2xC1). In the other half, incorrect sentences contained order violations, where A and C  
550 elements from a dependency swapped positions (i.e., C1xA1 and C2xA2). The complete offline test consisted in a  
551 total of 48 test phrases (24 per dependency). Participants were required to discriminate phrases that could belong to  
552 the previously heard language from phrases that could not by pressing the appropriate button. A maximum of 1500  
553 ms was allowed to respond, after which there was a jittered interval (1-3 secs.) before the next trial began. Participants'  
554 ability to discriminate rule items from violations was assessed by computing  $d'$  prime scores ( $d'$ ) from their responses.  
555 For each participant, the proportion of hits (i.e., yes responses to correct phrases) and false alarms (i.e., yes responses  
556 to incorrect phrases) was used to calculate the  $d'$  score. Hit and false alarm rates of zero or one were corrected  
557 according to Macmillan and Kaplan (1985). We computed two distinct  $d'$  scores by using false alarms to 1) order  
558 violations ( $d'$  Cat) and 2) to dependency violations ( $d'$  Dep). These scores were then submitted to one-sample t-tests  
559 against 0 to determine statistical significance. After a Rule block, the test for the corresponding language's Rule block

560 was administered. After a No Rule block, the test for the corresponding language's Rule block was administered. We  
561 thus expected learning of the language's specific dependencies (significant  $d'$  Dep) only in the Rule block but learning  
562 of positional information (significant  $d'$  Cat) after both Rule and No Rule blocks. Participants from both groups  
563 exhibited a similar pattern of results suggesting that they were able to significantly discriminate correct phrases from  
564 dependency violations only after the Rule block (Behavioral group Rule block: mean  $d'$  Dep = 0.92, std = 1.46,  $t(21)$   
565 = 2.97,  $p < 0.01$ ; Behavioral group No Rule block: mean  $d'$  Dep = 0.14, std = 0.52,  $t(21) = 1.3$ ,  $p > 0.2$ ; fMRI group  
566 Rule block: mean  $d'$  Dep = 0.36, std = 0.96,  $t(30) = 2.1$ ,  $p < 0.04$ ; fMRI group No Rule block: mean  $d'$  Dep = 0.12,  
567 std = 0.49,  $t(30) = 1.3$ ,  $p > 0.19$ ) and correct phrases from category violations after both Rule and No Rule blocks  
568 (Behavioral group Rule block: mean  $d'$  Cat = 1.74, std = 1.19,  $t(21) = 6.87$ ,  $p < 0.001$ ; Behavioral group No Rule block:  
569 mean  $d'$  Cat = 1.82, std = 1.18,  $t(21) = 7.23$ ,  $p < 0.001$ ; fMRI group Rule block: mean  $d'$  Cat = 1.36, std = 1.12,  $t(30) =$   
570 6.75,  $p < 0.001$ ; fMRI group No Rule block: mean  $d'$  Cat = 1.37, std = 1.01,  $t(30) = 7.55$ ,  $p < 0.001$ ).

## References

1. Saffran JR, Aslin RN, Newport EL. Statistical learning by 8-month-old infants. *Science* (80- ). 1996;247(5294):1926-8.
2. Saffran JR, Wilson DP. From syllables to syntax: Multilevel statistical learning by 12-month-old infants. *Infancy*. 2003;4(2):273-84.
3. Saffran JR, Johnson EK, Aslin RN, Newport EL. Statistical learning of tone sequences by human infants and adults. *Cognition*. 1999;70:27-52.
4. Gebhart AL, Newport EL, Aslin RN. Statistical Learning of Adjacent and Non-Adjacent Dependencies among Non-Linguistic Sounds. *Psychon Bull Rev*. 2009;16(3):486-90.
5. Creel SC, Newport EL, Aslin RN. Distant melodies: Statistical learning of nonadjacent dependencies in tone sequences. *J Exp Psychol Learn Mem Cogn*. 2004;30(5):1119-30.
6. Conway CM, Christiansen MH. Statistical Learning Within and Across Modalities: 2005;488-93.
7. Fiser J, Aslin RN. Statistical learning of higher-order temporal structure from visual shape sequences. *J Exp Psychol Learn Mem Cogn* [Internet]. 2002;28(3):458-67. Available from: <http://doi.apa.org/getdoi.cfm?doi=10.1037/0278-7393.28.3.458>
8. Conway CM, Christiansen MH. Modality-constrained statistical learning of tactile, visual, and auditory sequences. *J Exp Psychol Learn Mem Cogn*. 2005;31(1):24-39.
9. Gervain J, Macagno F, Cogoi S, Pena M, Mehler J. The neonate brain detects speech structure. *Proc Natl Acad Sci* [Internet]. 2008;105(37):14222-7. Available from: <http://www.pnas.org/cgi/doi/10.1073/pnas.0806530105>
10. Bulf H, Johnson SP, Valenza E. Visual statistical learning in the newborn infant. *Cognition*. 2011;121(1):127-32.
11. Meyer T, Olson CR. Statistical learning of visual transitions in monkey inferotemporal cortex. *Proc Natl Acad Sci* [Internet]. 2011;108(48):19401-6. Available from: <http://www.pnas.org/cgi/doi/10.1073/pnas.1112895108>
12. Toro JM, Trobalón JB. Statistical computations over a speech stream in a rodent. *Percept Psychophys*. 2005;67(5):867-75.
13. Siegelman N, Bogaerts L, Kronenfeld O, Frost R. Redefining “Learning” in Statistical Learning: What Does an Online Measure Reveal About the Assimilation of Visual Regularities? *Cogn Sci* [Internet]. 2018 Jun;42(1996):692-727. Available from: <http://doi.wiley.com/10.1111/cogs.12556>
14. Karuza EA, Emberson LL, Aslin RN. Combining fMRI and Behavioral Measures to Examine the Process of Human Learning. *Neurobiol Learn Mem*. 2014;1-31.
15. Conway CM, Bauernschmidt A, Huang SS, Pisoni DB. Implicit statistical learning in language processing: Word predictability is the key. *Cognition* [Internet]. [cited 2019 May 23];114:356-71. Available from: [www.tigerspeech.com](http://www.tigerspeech.com)
16. Frost R, Armstrong BC, Siegelman N, Christiansen MH. Domain generality versus modality specificity: The paradox of statistical learning. *Trends Cogn Sci* [Internet]. 2015;19(3):117-25. Available from: <http://dx.doi.org/10.1016/j.tics.2014.12.010>
17. Sutton RS, Barto AG. Time-Derivative Models of Pavlovian Reinforcement. In: Gabriel M, Moore J, editors. *Learning and Computational Neuroscience: Foundations of Adaptive Networks* [Internet]. MIT Press; 1990. p. 497-537. Available from: <https://www.worldcat.org/title/learning-and-computational-neuroscience-foundations-of-adaptive-networks/oclc/21520873>
18. Sutton RS, Barto AG. Reinforcement learning: an introduction. [Internet]. MIT Press. MIT Press; 2018. 1054 p. Available from: <http://incompleteideas.net/book/bookdraft2018jan1.pdf%0Ahttp://incompleteideas.net/sutton/book/bookdraft2017june.pdf>



19. White, Robert W. Motivation reconsidered: The concept of competence. *Psychol Rev.* 1959;66(5):297–333.
20. Barto AG. Intrinsic Motivation and Reinforcement Learning. In: Baldassarre G, Mirolli M, editors. *Intrinsically Motivated Learning in Natural and Artificial Systems*. Berlin: Springer-Verlag; 2013. p. 1–458.
21. Perruchet P, Vinter A. PARSE: A Model for Word Segmentation. *J Mem Lang.* 1998;39(2):246–63.
22. Misyak JB, Christiansen MH, Tomblin JB. Sequential expectations: The role of prediction-based learning in language. *Top Cogn Sci.* 2010;2(1):138–53.
23. Montague PR, Dayan P, Sejnowski J. A Framework for Mesencephalic Predictive Hebbian Learning. *J Neurosci.* 1996;76(5):1936–47.
24. O’Doherty J, Dayan P, Schultz J, Deichmann R, Friston K, Dolan RJ. Dissociable Role of Ventral and Dorsal Striatum in Instrumental Conditioning. *Science (80- ) [Internet].* 2004;304(5669):452–4. Available from: <http://www.ncbi.nlm.nih.gov/pubmed/15087550>
25. Knutson B, Fong GW, Adams CM, Varner JL, Hommer D. Dissociation of reward anticipation and outcome with event-related fMRI. *Neuroreport.* 2001;12(17):3683–7.
26. Lauwereyns J, Watanabe K, Coe B, Hikosaka O. A neural correlate of response bias in monkey caudate nucleus. *Nat Publ Gr [Internet].* 2002;418:413–7. Available from: [http://www.ncbi.nlm.nih.gov/entrez/query.fcgi?cmd=Retrieve&db=PubMed&dopt=Citation&list\\_uids=4601820](http://www.ncbi.nlm.nih.gov/entrez/query.fcgi?cmd=Retrieve&db=PubMed&dopt=Citation&list_uids=4601820)
27. Samejima K, Ueda Y, Doya K, Kimura M. Neuroscience: Representation of action-specific reward values in the striatum. *Science (80- ).* 2005;310(5752):1337–40.
28. Schönberg T, Daw ND, Joel D, Doherty JPO. Reinforcement Learning Signals in the Human Striatum Distinguish Learners from Nonlearners during Reward-. *J Neuropsychiatry Clin Neurosci.* 2007;27(47):12860–7.
29. Conway CM, Pisoni DB. Neurocognitive Basis of Implicit Learning of Sequential Structure and Its Relation to Language Processing. *Ann N Y Acad Sci.* 2008;131(1145):113–31.
30. De Diego-Balaguer R, Couette M, Dolbeau G, Dürr A, Youssov K, Bachoud-Lévi AC. Striatal degeneration impairs language learning: Evidence from Huntington’s disease. *Brain.* 2008;131(11):2870–81.
31. Karuza EA, Newport EL, Aslin RN, Starling SJ, Tivarus ME, Bavelier D. The neural correlates of statistical learning in a word segmentation task: An fMRI study. *BRAIN Lang.* 2013;127(1):1–21.
32. Plante E, Patterson D, Gómez R, Almryde KR, White MG, Asbjørnsen AE. The nature of the language input affects brain activation during learning from a natural language. *J Neurolinguistics.* 2015;36:17–34.
33. Gomez R, Maye J. The Developmental Trajectory of Nonadjacent Dependency Learning The Developmental Trajectory of Nonadjacent Dependency Learning. *Infancy.* 2005;7(2):183–206.
34. López-Barroso D, Cucurell D, Rodríguez-Fornells A, de Diego-Balaguer R. Attentional effects on rule extraction and consolidation from speech. *Cognition.* 2016;152:61–9.
35. Rescorla RA, Wagner AR. A theory of Pavlovian conditioning: variations in the effectiveness of reinforcement and non reinforcement. In: Black AH, Prokasy WF, editors. *Classical conditioning II: current research and theory [Internet].* 1972. p. 64–99. Available from: <papers2://publication/uuid/51EED98C-39D3-4ECA-9CC8-F7E445CCB145>
36. Niv Y, Schoenbaum G. Dialogues on prediction errors. *Trends Cogn Sci.* 2008;12(7):265–72.
37. Niv Y, Montague PR. Theoretical and Empirical Studies of Learning. 2008;329–50.
38. Colder B. The basal ganglia select the expected sensory input used for predictive coding. *Front Comput Neurosci [Internet].* 2015;9(September):1–10. Available from:

- <http://journal.frontiersin.org/Article/10.3389/fncom.2015.00119/abstract>
39. Misyak JB, Christiansen MH, Tomblin JB. On-line individual differences in statistical learning predict language processing. 2010;1(September):1-9.
  40. Buiatti M, Peña M, Dehaene-Lambertz G. Investigating the neural correlates of continuous speech computation with frequency-tagged neuroelectric responses. *Neuroimage* [Internet]. 2009;44(2):509-19. Available from: <http://dx.doi.org/10.1016/j.neuroimage.2008.09.015>
  41. Farthouat J, Franco A, Mary A, Delpouve J, Wens V, Op de Beeck M, et al. Auditory Magnetoencephalographic Frequency-Tagged Responses Mirror the Ongoing Segmentation Processes Underlying Statistical Learning. *Brain Topogr* [Internet]. 2017 Mar 9 [cited 2019 Apr 21];30(2):220-32. Available from: <http://link.springer.com/10.1007/s10548-016-0518-y>
  42. Henin S, Turk-Browne N, Friedman D, Liu A, Dugan P, Flinker A, et al. Statistical learning shapes neural sequence representations. *bioRxiv* [Internet]. 2019 [cited 2019 Apr 21]; Available from: <http://dx.doi.org/10.1101/583856>
  43. Morris G, Nevet A, Arkadir D, Vaadia E, Bergman H. Midbrain dopamine neurons encode decisions for future action. *Nat Neurosci*. 2006;9(8):1057-63.
  44. Roesch MR, Calu DJ, Schoenbaum G. Dopamine neurons encode the better option in rats deciding between differently delayed or sized rewards. *Nat Neurosci*. 2007;10(12):1615-24.
  45. Morris G, Arkadir D, Nevet A, Vaadia E, Bergman H. Coincident but distinct messages of midbrain dopamine and striatal tonically active neurons. *Neuron*. 2004;43(1):133-43.
  46. Bromberg-Martin ES, Matsumoto M, Hikosaka O. Dopamine in motivational control: rewarding, aversive, and alerting. *Neuron* [Internet]. 2010;68(5):815-34. Available from: <http://search.ebscohost.com/login.aspx?direct=true&db=rzh&AN=1993159104&lang=nl&site=ehost-live&scope=site>
  47. Barto AG. Adaptive critics and the basal ganglia. In: *Models of information processing in the basal ganglia*. Cambridge, MA, US: The MIT Press; 1995. p. 215-32. (Computational neuroscience.).
  48. Doya K. What are the computations of the cerebellum, the basal ganglia and the cerebral cortex? Vol. 12, *Neural Networks*. 1999. p. 961-74.
  49. Frank MJ. Computational models of motivated action selection in corticostriatal circuits. *Curr Opin Neurobiol*. 2011;21:381-6.
  50. Schultz W, Dayan P, Montague PR. A Neural Substrate of Prediction and Reward. 1997;275(MARCH):1593-600.
  51. Fiorillo CD, Tobler PN, Schultz W. Discrete Coding of Reward Dopamine Neurons. *Science* (80-) [Internet]. 2003;299(March):1898-902. Available from: <http://www.sciencemag.org/content/299/5614/1898.short>
  52. O'Reilly RC, Frank MJ. Making working memory work: A computational model of learning in the prefrontal cortex and basal ganglia. *Neural Comput*. 2006;18(2):283-328.
  53. Berridge KC, Kringelbach ML. Affective neuroscience of pleasure: reward in humans and animals. [cited 2019 May 23]; Available from: <https://www.ncbi.nlm.nih.gov/pmc/articles/PMC3004012/pdf/nihms257672.pdf>
  54. Ripollés P, Marco-Pallarés J, Hielscher U, Mestres-Missé A, Tempelmann C, Heinze HJ, et al. The role of reward in word learning and its implications for language acquisition. *Curr Biol*. 2014;24(21):2606-11.
  55. Ripollés P, Marco-Pallarés J, Alicart H, Tempelmann C, Rodríguez-Fornells A, Noesselt T. Intrinsic monitoring of learning success facilitates memory encoding via the activation of the SN/VTA-hippocampal loop. *Elife*. 2016;5(September):1-35.
  56. Ripollés P, Ferreri L, Mas-Herrero E, Alicart H, Gómez-Andrés A, Marco-Pallares J, et al. Intrinsically regulated learning is modulated by synaptic dopamine signaling. *Elife*. 2018;7:1-23.

57. Singh S, Barto AG, Chentanez N. Intrinsically Motivated Reinforcement Learning. *Adv Neural Inf Process Syst*. 2004;1-8.
58. O'Doherty JP. Reward representations and reward-related learning in the human brain: Insights from neuroimaging. *Curr Opin Neurobiol*. 2004;14(6):769-76.
59. Zink CF, Pagnoni G, Martin ME, Dhamala M, Berns GS. Human striatal response to salient nonrewarding stimuli. *J Neurosci* [Internet]. 2003;23(22):8092-7. Available from: <http://www.ncbi.nlm.nih.gov/pubmed/12954871>
60. Shulman GL, Astafiev S V, Franke D, Pope DLW, Snyder AZ, Mcavoy MP, et al. Interaction of Stimulus-Driven Reorienting and Expectation in Ventral and Dorsal Frontoparietal and Basal Ganglia- Cortical Networks. 2009;29(14):4392-407.
61. Frank MJ, Loughry B, O'Reilly RC. Interactions between frontal cortex and basal ganglia in working memory: A computational model. *Cogn Affect Behav Sci* [Internet]. 2001;1(2):137-60. Available from: <http://www.colorado.edu/ics/sites/default/files/attached-files/00-01.pdf>
62. De Diego Balaguer R, Toro JM, Rodríguez-Fornells A, Bachoud-Lévi AC. Different neurophysiological mechanisms underlying word and rule extraction from speech. *PLoS One*. 2007;2(11).
63. De Diego-Balaguer R, Rodríguez-Fornells A, Bachoud-Lévi A-C. Prosodic cues enhance rule learning by changing speech segmentation mechanisms. *Front Psychol* [Internet]. 2015;6(September):1-11. Available from: <http://journal.frontiersin.org/Article/10.3389/fpsyg.2015.01478/abstract>
64. Alexander G. Parallel Organization of Functionally Segregated Circuits Linking Basal Ganglia and Cortex. *Annu Rev Neurosci* [Internet]. 1986;9(1):357-81. Available from: <http://neuro.annualreviews.org/cgi/doi/10.1146/annurev.neuro.9.1.357>
65. Du Y, Buchsbaum BR, Grady CL, Alain C. Noise differentially impacts phoneme representations in the auditory and speech motor systems. *Proc Natl Acad Sci* [Internet]. 2014;111(19):7126-31. Available from: <http://www.pnas.org/cgi/doi/10.1073/pnas.1318738111>
66. Ullman MT. Contributions of memory circuits to language: The declarative/procedural model. *Cognition*. 2004;92(1-2):231-70.
67. Poldrack RA, Sabb FW, Foerde K, Tom SM, Asarnow RF, Bookheimer SY, et al. The Neural Correlates of Motor Skill Automaticity. 2005;25(22):5356-64.
68. Cools R, Ivry RB, D'Esposito M. The human striatum is necessary for responding to changes in stimulus relevance. *J Cogn Neurosci*. 2006;18(12):1973-83.
69. Opitz B, Friederici AD. Interactions of the hippocampal system and the prefrontal cortex in learning language-like rules. *Neuroimage*. 2003;19(4):1730-7.
70. Tettamanti M, Alkadhi H, Moro A, Perani D, Kollias S, Weniger D. Neural correlates for the acquisition of natural language syntax. *Neuroimage*. 2002;17(2):700-9.
71. Campbell JID, Thompson VA. MorePower 6.0 for ANOVA with relational confidence intervals and Bayesian analysis. *Behav Res Methods*. 2012 Dec 22;44(4):1255-65.
72. Cohen J. *Statistical Power Analysis for the Behavioral Sciences*. Statistical Power Analysis for the Behavioral Sciences. New York: Lawrence Erlbaum Associates; 1988.
73. Bush RR, Mosteller F. A mathematical model for simple learning. *Psychol Rev*. 1951;58(5):313-23.
74. Marco-Pallarés J, Mohammadi B, Samii A, Münte TF. Brain activations reflect individual discount rates in intertemporal choice. *Brain Res* [Internet]. 2010;1320:123-9. Available from: <http://dx.doi.org/10.1016/j.brainres.2010.01.025>
75. Cohen MX, Ranganath C. Reinforcement Learning Signals Predict Future Decisions. *J Neurosci*. 2007;27(2):371-8.
76. Ashburner J, Friston KJ. Unified segmentation. *Neuroimage*. 2005;26(3):839-51.

77. Tzourio-Mazoyer N, Landeau B, Papathanassiou D, Crivello F, Etard O, Delcroix N, et al. Automated anatomical labeling of activations in SPM using a macroscopic anatomical parcellation of the MNI MRI single-subject brain. *Neuroimage*. 2002;15(1):273–89.

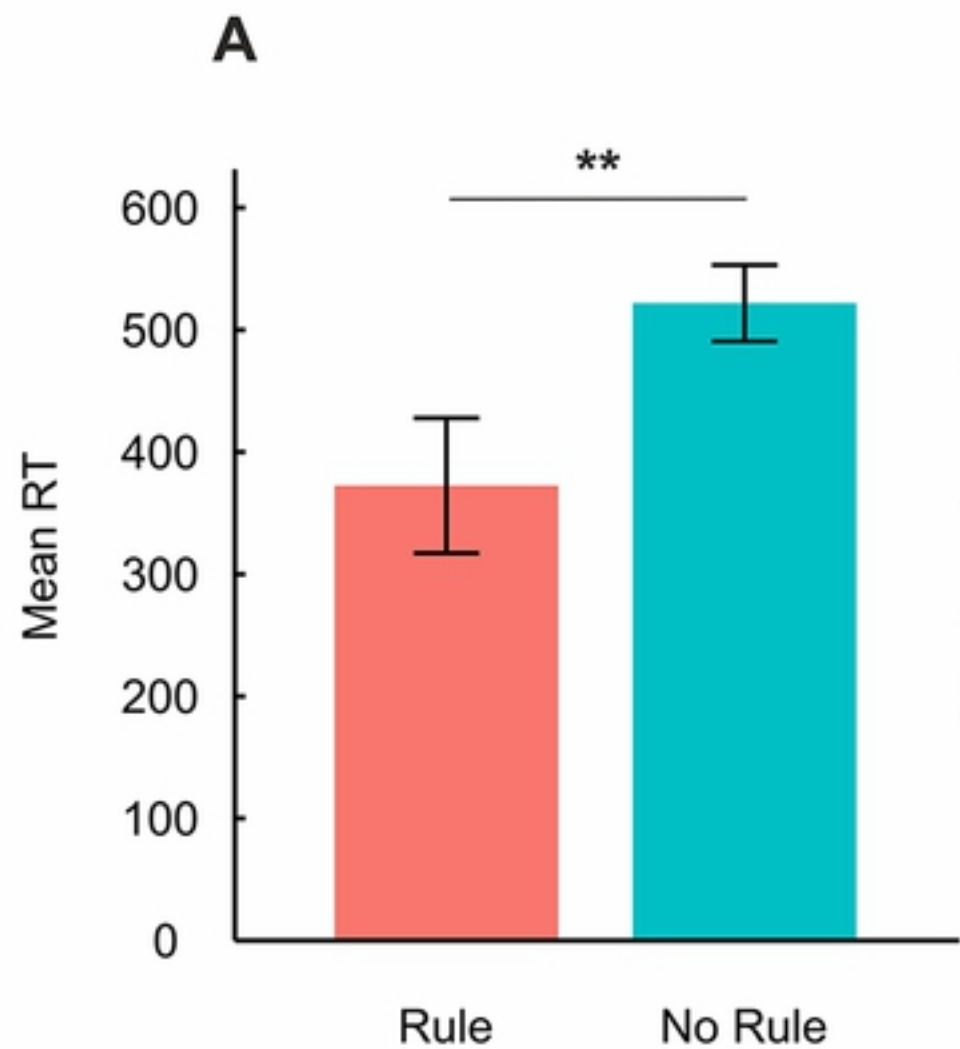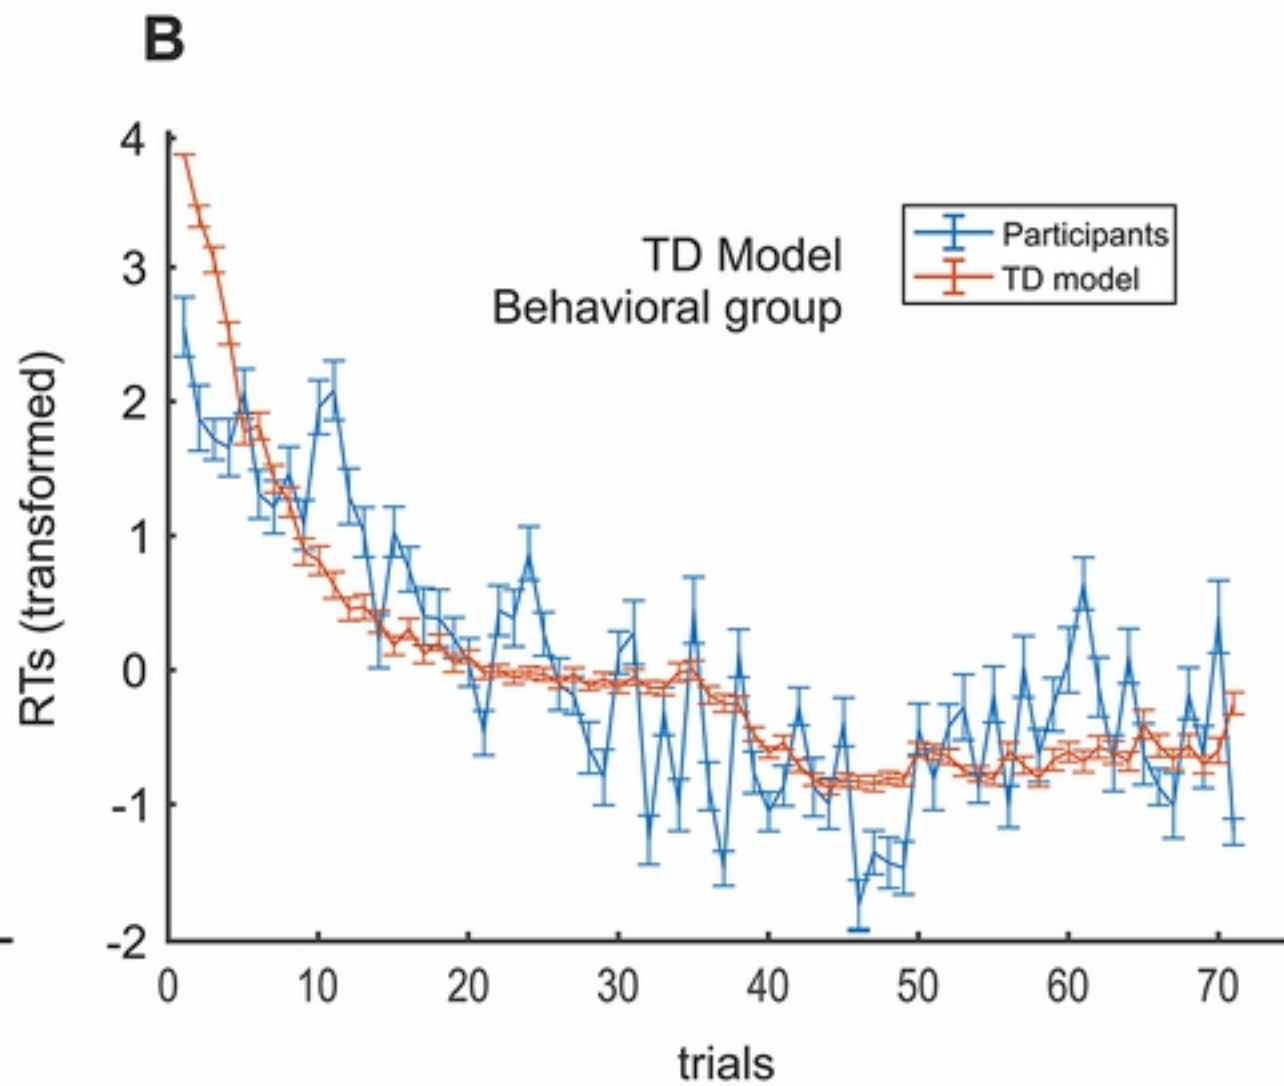

Figure

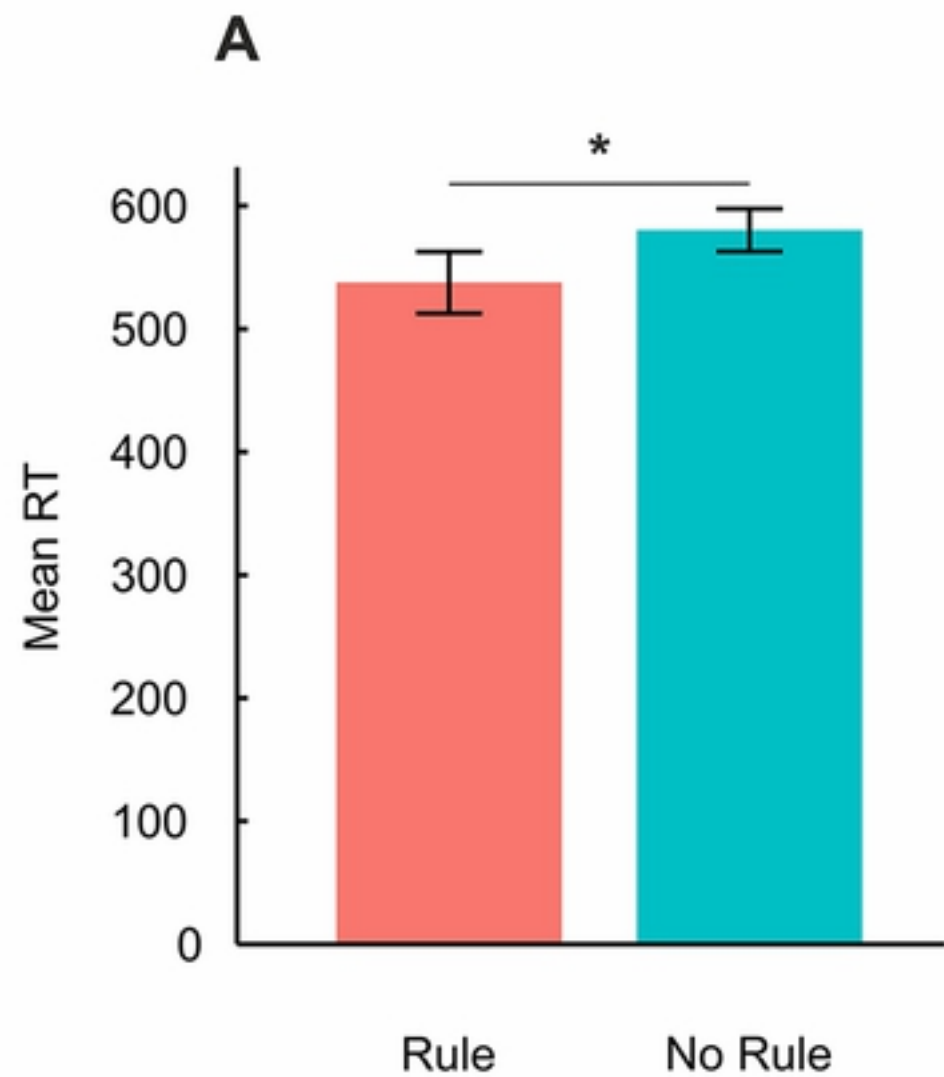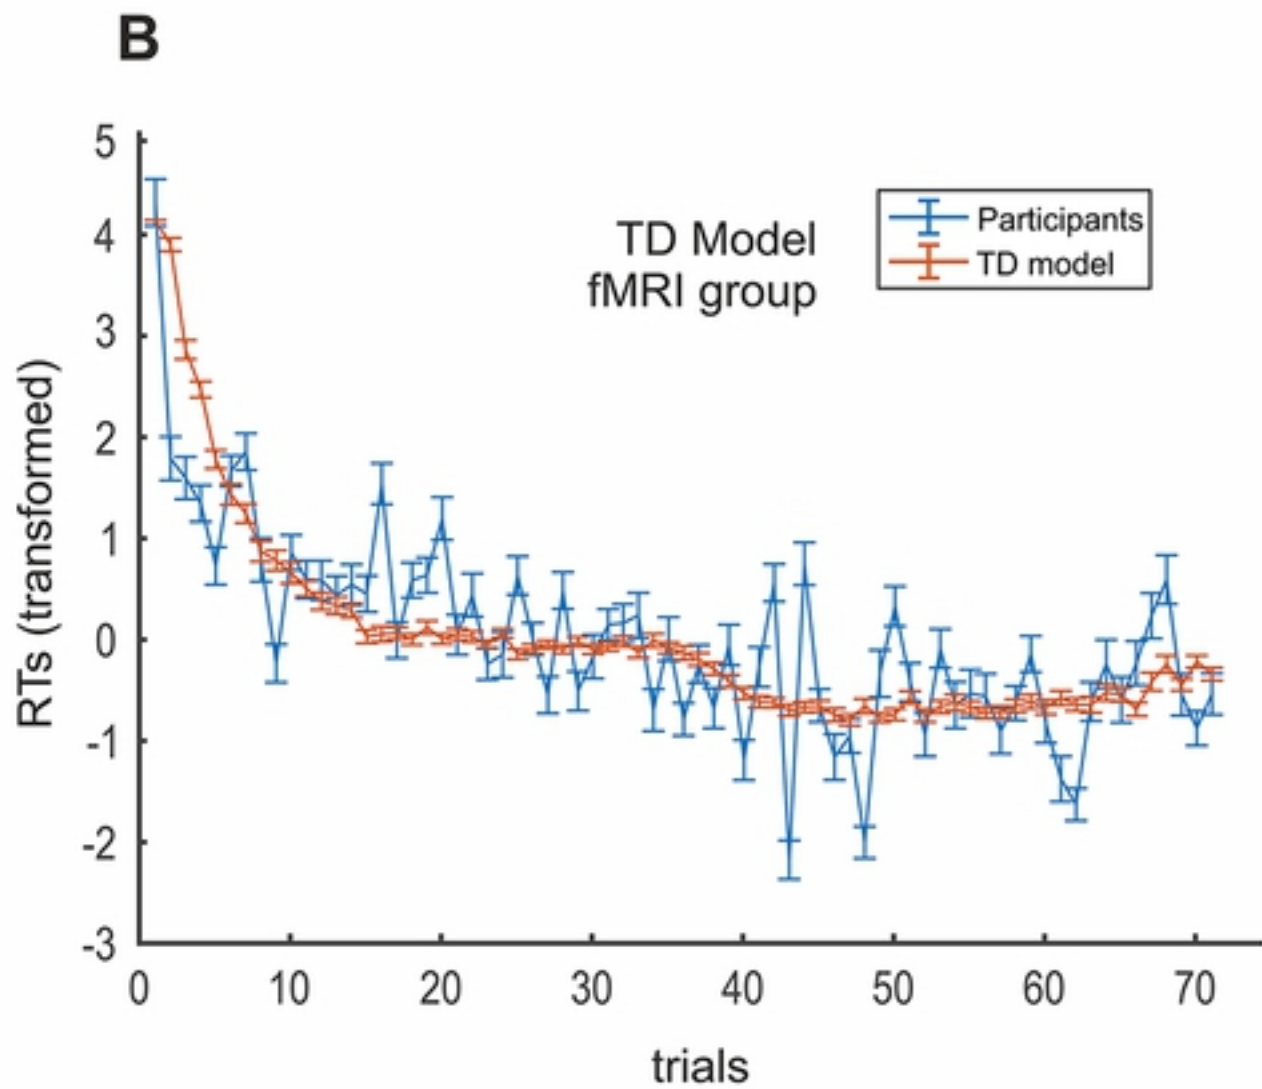

Figure

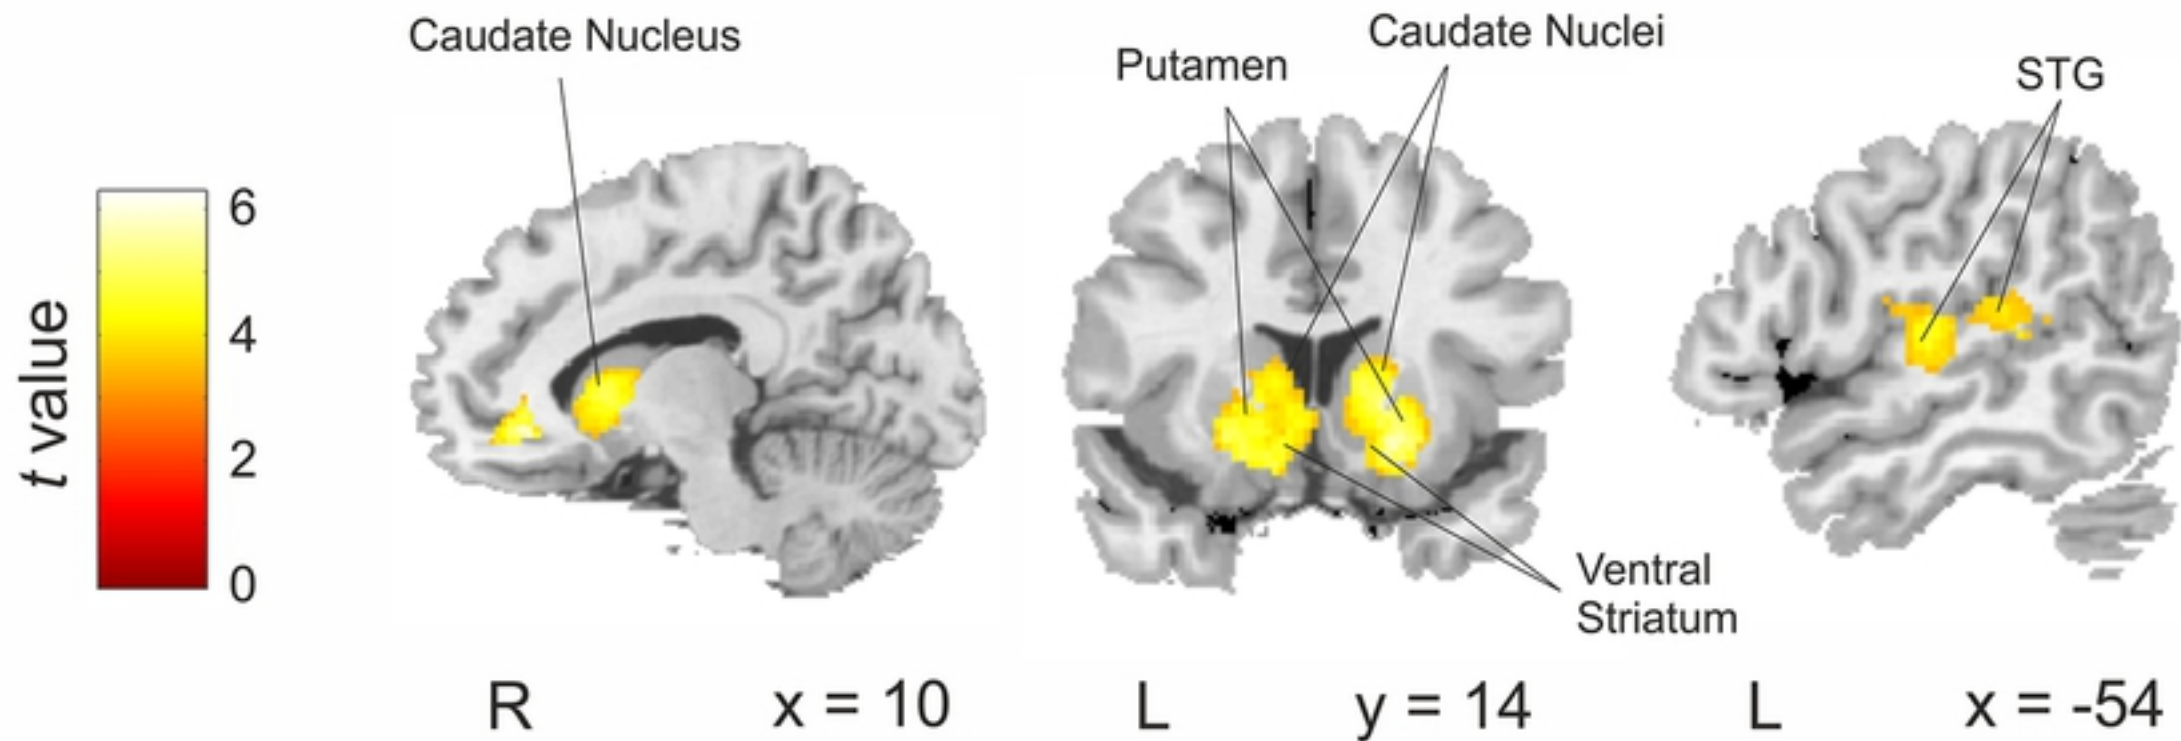

Figure
